# Supplementary material for: GPR30 in spinal cholecystokinin-positive neurons modulates neuropathic pain
Source: eLife. 2025 Dec 23;13:RP102874. doi: 10.7554/eLife.102874 (PMC12726830; doi:10.7554/eLife.102874)
Supplement: Figure 1—source data 1. [file elife-102874-fig1-data1.xlsx]

## Sheet: Figure 1
B
SDH
GAPDH				Gper1
Group	Ct	mean Ct		sample	Ct	mean Ct	△Ct	2^(-△Ct）	2^(-△△Ct）
sham 1	19.08	19.0367		sham 1	27.67	27.8833	8.84667	0.00217214	0.848787
	19.03				28.03
	19				27.95
sham 2	19.15	19.1333		sham 2	27.46	27.6433	8.51	0.00274306	1.07188
	19.14				27.49
	19.11				27.98
sham 3	18.95	18.9733		sham 3	27.45	27.4733	8.5	0.00276214	1.07933
	18.99				27.4
	18.98				27.57
CCI 1	19.21	19.32		CCI 1	27.33	27.41	8.09	0.00367001	1.4341
	19.3				27.44
	19.45				27.46
CCI 2	19.08	19.06		CCI 2	26.21	26.2667	7.20667	0.00676982	2.64538
	19.07				26.2
	19.03				26.39
CCI 3	19.43	19.36		CCI 3	27.23	26.8767	7.51667	0.00546082	2.13387
	19.34				27.29
	19.31				26.11
						Mean Sham		0.00255911
DRG
GAPDH		Gper1
Group	mean Ct	sample	mean Ct	△Ct	2^(-△Ct）	2^(-△△Ct）
CCI 1	20.66	Sham 1	31.55	10.89	0.000526967	0.909721
CCI 2	17.27	Sham 2	28.27	11	0.000488281	0.842936
CCI 3	20.02	Sham 3	30.99	10.97	0.000498541	0.860648
CCI 4	19.32	Sham 4	30.2	10.88	0.000530632	0.916048
Sham 1	18.25	CCI 1	28.88	10.63	0.000631032	1.08937
Sham 2	17.12	CCI 2	28.05	10.93	0.000512557	0.884844
Sham 3	17.37	CCI 3	28.23	10.86	0.00053804	0.928836
Sham 4	18.38	CCI 4	29	10.62	0.000635421	1.09695
			Mean Sham		0.000579262
C-E
Female
VF	Sham + Vehicle						CCI + Vehicle						CCI + G-15
Baseline	0.377094	0.420388	0.223975	0.223975	0.281644	0.168927	0.144827	0.358014	0.553796	0.420727	0.440099	0.168927	0.357437	0.223975	0.377094	0.220267	0.453367	0.358014
Treatment	0.252639	0.281644	0.130317	0.281644	0.223975	0.144827	0.0135503	0.0135503	0.0177011	0.031042	0.0135503	0.0135503	0.281644	0.480231	0.18321	0.171811	0.252639	0.0580096
Brush	Sham + Vehicle						CCI + Vehicle						CCI + G-15
Baseline	30	20	30	30	30	50	30	20	20	30	30	30	30	30	10	30	20	40
Treatment	30	30	10	30	20	40	100	90	70	80	80	80	20	40	30	30	30	50
Heat-Treatment	Sham + Vehicle						CCI + Vehicle						CCI + G-15
1st	6.7	6.1	8.1	2.4	3.6	2.2	1.5	2.5	1.1	1.1	0.9	1.9	6.4	5.1	4.3	5.7	4.8	3.8
2nd	3.1	7.9	2.9	6.9	8.6	5.8	1.8	2.2	1.7	1.7	1.3	0.9	3.9	3.2	4.5	5.3	3.6	3.3
3rd	6.1	4.9	2.4	6.6	3.1	3.9	1.9	1.6	1.9	1.5	0.9	1.4	3.1	3.7	1.9	4.3	3.7	3.5
Mean	5.3	6.3	4.47	5.3	5.1	3.97	1.73	2.1	1.57	1.43	1.03	1.4	4.47	4	3.57	5.1	4.03	3.53
Male
VF	Sham + Vehicle						CCI + Vehicle						CCI + G-15
Baseline	0.36	0.55	0.41	0.56	0.55	0.55	0.27	0.56	0.45	0.71	0.33	0.56	0.45	0.56	0.37	0.42	0.55	0.55
Treatment	0.27	0.35	0.48	0.45	0.46	0.46	0.06	0.02	0.02	0.04	0.08	0.02	0.23	0.17	0.27	0.35	0.32	0.32
Brush	Sham + Vehicle						CCI + Vehicle						CCI + G-15
Baseline	10	0	20	0	10	10	10	20	20	0	10	10	10	0	20	10	10	10
Treatment	20	10	20	20	10	10	70	80	100	70	80	80	40	40	30	20	30	20
Heat	Sham + Vehicle						CCI + Vehicle						CCI + G-15
1st	7.8	10.1	10.3	9.9	8.2	8.4	3.9	4.1	3.4	4.5	3.8	3.7	5.2	7.8	7.8	6.9	5.7	5.8
2nd	7	8.2	9.1	8.2	8.1	7.9	3.3	2	2.2	3.8	3.2	3.5	4.2	6.1	5.3	6.2	4.1	5.2
3rd	4	8.4	7.9	8。1	5.9	6.2	2.4	3.2	1.8	4	2.3	3.3	4.5	3.2	7	3.4	2.7	5.5
Mean	6.26667	8.9	9.1	9.05	7.4	7.5	3.2	3.1	2.46667	4.1	3.1	3.5	4.63333	5.7	6.7	5.5	4.16667	5.5
G-J
Female
Sham + Vehicle									CCI + Vehicle									CCI + G-15
Mice 1			Mice 2			Mice 3			Mice 1			Mice 2			Mice 3			Mice 1			Mice 2			Mice 3
Slice	c-Fos	Double labeled	Slice	c-Fos	Double labeled	Slice	c-Fos	Double labeled	Slice	c-Fos	Double labeled	Slice	c-Fos	Double labeled	Slice	c-Fos	Double labeled	Slice	c-Fos	Double labeled	Slice	c-Fos	Double labeled	Slice	c-Fos	Double labeled
1	3	2	1	12	7	1	11	7	1	36	28	1	36	30	1	44	36	1	19	11	1	17	13	1	15	11
2	8	6	2	15	11	2	11	9	2	35	30	2	39	30	2	26	20	2	21	16	2	14	8	2	18	13
3	6	5	3	8	6	3	10	8	3	20	18	3	45	38	3	46	37	3	25	18	3	12	7	3	6	4
4	9	6	4	13	7	4	9	6	4	26	18	4	44	36	4	45	40	4	14	8	4	13	8	4	12	8
Mean	6.5	4.75	Mean	12	7.75	Mean	10.25	7.5	Mean	29.25	23.5	Mean	41	33.5	Mean	40.25	33.25	Mean	19.75	13.25	Mean	14	9	Mean	12.75	9
% of c-Fos		73.0769	% of c-Fos		64.5833	% of c-Fos		73.1707	% of c-Fos		80.3419	% of c-Fos		81.7073	% of c-Fos		82.6087	% of c-Fos		67.0886	% of c-Fos		64.2857	% of c-Fos		70.5882
Male
Sham + Vehicle									CCI + Vehicle									CCI + G-15
Mice 1			Mice 2			Mice 3			Mice 1			Mice 2			Mice 3			Mice 1			Mice 2			Mice 3			Mice 4
Slice	c-Fos	Double labeled	Slice	c-Fos	Double labeled	Slice	c-Fos	Double labeled	Slice	c-Fos	Double labeled	Slice	c-Fos	Double labeled	Slice	c-Fos	Double labeled	Slice	c-Fos	Double labeled	Slice	c-Fos	Double labeled	Slice	c-Fos	Double labeled	Slice	c-Fos	Double labeled
1	8	5	1	6	4	1	3	2	1	31	26	1	24	19	1	36	30	1	12	7	1	5	3	1	16	10	1	1	1
2	10	8	2	7	5	2	4	3	2	25	21	2	33	28	2	28	23	2	9	5	2	4	3	2	14	10	2	3	2
3	5	4	3	10	8	3	7	5	3	18	14	3	25	20	3	34	26	3	9	6	3	7	5	3	15	10	3	5	3
4	5	3	Mean	7.66667	5.66667	4	4	3	4	22	19	Mean	27.3333	22.3333	4	24	20	4	14	9	Mean	5.33333	3.66667	4	5	2	4	7	3
5	2	2	% of c-Fos		73.913	Mean	4.5	3.25	Mean	24	20	% of c-Fos		81.7073	5	20	15	Mean	11	6.75	% of c-Fos		68.75	Mean	12.5	8	mean	4	2.25
Mean	6	4.4				% of c-Fos		72.2222	% of c-Fos		83.3333				6	18	15	% of c-Fos		61.3636				% of c-Fos		64	% of c-Fos		56.25
% of c-Fos		73.3333													Mean	26.6667	21.5
															% of c-Fos		80.625

## Sheet: Figure 1-supplement figure 1
A-B
Female
VF	Vehicle						G-15
Baseline	0.252639	0.281644	0.55335	0.281644	0.480231	0.281644	0.357437	0.223975	0.357437	0.420388	0.377094	0.362744
Treatment	0.281644	0.248313	0.420388	0.220267	0.252639	0.286616	0.357437	0.143632	0.220267	0.252639	0.357437	0.223975
Heat-Treatment	Vehicle						G-15
1st	6.3	4.1	8	4	3.9	5.2	4.1	5.9	7.1	7.8	7.1	6.5
2nd	4.3	3.9	6.8	6.2	3.3	4.2	4	5.6	7	6.9	5.1	5.9
3rd	3.8	6.4	5.2	5.1	4.3	6.2	3.2	4.8	5.7	5.2	4.4	4.1
Mean	4.8	4.8	6.67	5.1	3.83	5.2	3.77	5.43	6.6	6.63	5.53	5.5
Male
VF	Vehicle						G-15
Baseline	0.374067	0.439036	0.158672	0.777405	0.355509	0.439036	0.374067	0.421745	0.449728	0.703558	0.27227	0.449728
Treatment	0.27227	0.421745	0.449728	0.4783	0.449728	0.421745	0.449728	0.158672	0.352574	0.355509	0.449728	0.449728
Heat	Vehicle						G-5
1st	12.9	5	13.1	11.9	8.7	10.1	7.9	6.3	8.3	4.9	6.4	7.7
2nd	8.4	4.9	10.7	5.4	4.7	8.4	6.2	9.2	13.1	6.8	6.4	6.8
3rd	8.1	4.9	7.3	6.2	6.5	7	5.8	7.1	7.2	6.3	6.1	5
Mean	9.8	4.93	10.37	7.83	6.63	8.5	6.63	7.53	9.53	6	6.3	6.5
C
	Vehicle						G-15
BL	0.98	0.51	0.98	0.65	0.4	0.75	0.65	0.98	0.59	0.65	0.59	0.32
CCI	0.04	0.02	0.07	0.07	0.02	0.02	0.07	0.04	0.03	0.03	0.04	0.02
0.5h	0.04	0.03	0.02	0.03	0.03	0.02	0.4	0.36	0.51	0.4	0.29	0.36
1h	0.04	0.02	0.06	0.03	0.06	0.02	0.75	0.75	0.75	0.17	0.19	0.65
2h	0.02	0.04	0.03	0.06	0.05	0.02	0.98	0.51	0.44	0.23	0.75	0.98
6h	0.05	0.03	0.02	0.02	0.03	0.03	0.23	0.51	0.4	0.98	0.29	0.59
24h	0.02	0.02	0.03	0.02	0.02	0.03	0.23	0.19	0.09	0.08	0.11	0.12
D-F
Female
VF	Vehicle						G-1
Baseline	0.281644	0.281644	0.55335	0.281644	0.480231	0.286616	0.420388	0.377094	0.225424	0.252639	0.55335	0.374067
Treatment	0.252639	0.248313	0.420388	0.220267	0.252639	0.281644	0.017701	0.031042	0.062734	0.025936	0.031042	0.0259358
Brush	Vehicle						G-1
Baseline	30	40	20	30	30	10	30	40	20	30	10	40
Treatment	40	50	30	30	30	10	60	90	70	90	60	80
Heat	Vehicle						G-1
1st	6.7	5.4	5.7	8.1	8.3	6.6	4.1	2.8	3.2	3.5	2.8	2.2
2nd	6.4	5.1	5.4	7.3	7.5	5.1	3.1	2	2.5	2.5	2	1.8
3rd	4.6	3.9	4.6	5.9	6.6	4.6	2.3	1.9	1.9	2	1.6	1.6
Mean	5.9	4.8	5.57	7.1	7.47	5.43	3.17	2.23	2.53	2.67	2.13	1.83
Male
VF	Vehicle						G-1
Baseline	0.36	0.35	0.41	0.56	0.55	0.56	0.27	0.78	0.45	0.35	0.33	0.362744
Treatment	0.27	0.35	0.48	0.45	0.46	0.45	0.02	0.0271019	0.107387	0.0204409	0.0450661	0.0349623
Brush	Vehicle						G-1
Baseline	0	20	20	10	30	20	10	10	20	0	10	30
Treatment	30	20	30	10	10	30	70	50	90	60	60	80
Heat	Vehicle						G-1
1st	8.9	7.2	8.8	6.9	12.6	8.9	7.1	6.1	3.9	4.4	4.7	5.2
2nd	8.7	6.3	7.1	6.1	9.2	8.8	6.2	5.1	3.3	3.6	4.4	4.4
3rd	8.1	4.8	5.8	5.9	7.3	7.7	5.3	4.5	2.4	4.3	4.3	3.8
Mean	8.56667	6.1	7.23333	6.3	9.7	8.46667	6.2	5.23333	3.2	4.1	4.46667	4.46667
G
	Vehicle						G-1
BL	0.75	0.65	0.23	0.32	0.51	0.4	0.65	0.98	0.59	0.65	0.4	0.32
0.5h	0.29	0.32	0.19	0.36	0.19	0.32	0.02	0.03	0.03	0.04	0.06	0.02
1h	0.65	0.27	0.4	0.33	0.27	0.4	0.05	0.02	0.02	0.03	0.05	0.02
2h	0.98	0.51	0.59	0.32	0.65	0.4	0.03	0.02	0.02	0.03	0.02	0.03
6h	0.4	0.27	0.33	0.65	0.75	0.98	0.04	0.04	0.02	0.03	0.11	0.02
24h	0.75	0.44	0.4	0.75	0.4	0.29	0.08	0.06	0.1	0.04	0.02	0.1
48h	0.4	0.75	0.59	0.51	0.65	0.4	0.07	0.11	0.19	0.09	0.13	0.05
I-J
Vehicle									G-1
Mice 1			Mice 2			Mice 3			Mice 1			Mice 2			Mice 3
Slice	c-Fos	Double labeled	Slice	c-Fos	Double labeled	Slice	c-Fos	Double labeled	Slice	c-Fos	Double labeled	Slice	c-Fos	Double labeled	Slice	c-Fos	Double labeled
1	14	8	1	4	2	1	7	5	1	18	14	1	19	16	1	27	23
2	12	6	2	8	5	2	2	1	2	24	20	2	21	18	2	29	26
3	7	5	3	10	6	3	7	5	3	22	19	3	20	18	3	20	14
Mean	11	6.33333	4	3	3	4	3	2	mean	21.3333	17.6667	mean	0	17.3333	mean	25.3333	21
% of c-Fos		57.5758	5	2	1	mean	4.75	3.25	% of c-Fos		82.8125	% of c-Fos		86.6667	% of c-Fos		82.8947
			Mean	5.4	3.4	% of c-Fos		68.4211
			% of c-Fos		62.963

## Sheet: statistic analysis
Figure 1	B (SDH)	sham	CCI		3	3		Unpaired Student's t-test	*, P=0.0406			t=2.983, df=4
	B (DRG)	sham	CCI		4	4		Unpaired Student's t-test	ns, P=0.0865			t=2.048, df=6
	C	Sham+Vehicle Female	CCI+Vehicle Female	CCI+G-15 Female	6	6	6	two-way ANOVA with Turkey's multiple comparisons test	Baseline: ns, P=0.5513 (S+V vs C+V); P=0.7008 (S+V vs C+G); P=0.9681 (C+V vs C+G)	Treatment: **, P=0.0076 (S+V vs C+V); ns, P=0.9441 (S+V vs C+G); **, P=0.0033 (C+V vs C+G)		F (2, 30) = 5.577
		Sham+Vehicle Male	CCI+Vehicle Male	CCI+G-15 Male	6	6	6	two-way ANOVA with Turkey's multiple comparisons test	Baseline: ns, P=0.9495 (S+V vs C+V); P=0.9673 (S+V vs C+G); P-0.9979 (C+V vs C+G)	Treatment: ****, P<0.0001 (S+V vs C+V); *, P=0.0477 (S+V vs C+G); ***, P=0.0004 (C+V vs C+G)		F (2, 30) = 11.04
	D	Sham+Vehicle Female	CCI+Vehicle Female	CCI+G-15 Female	6	6	6	two-way ANOVA with Turkey's multiple comparisons test	Baseline: ns, P=0.6417 (S+V vs C+V); P=0.6417 (S+V vs C+G); P>0.9999 (C+V vs C+G)	Treatment: ****, P<0.0001 (S+V vs C+V); ns, P=0.4589 (S+V vs C+G); ****, P<0.0001 (C+V vs C+G)		F (2, 30) = 35.12
		Sham+Vehicle Male	CCI+Vehicle Male	CCI+G-15 Male	6	6	6	two-way ANOVA with Turkey's multiple comparisons test	Baseline: ns, P=0.7523 (S+V vs C+V); P=0.9308 (S+V vs C+G); P=0.9308 (C+V vs C+G)	Treatment: ****, P<0.0001 (S+V vs C+V); **, P=0.0078 (S+V vs C+G); ****, P<0.0001 (C+V vs C+G)		F (2, 30) = 49.43
	E	Sham+Vehicle Female	CCI+Vehicle Female	CCI+G-15 Female	6	6	6	one-way ANOVA with Turkey's multiple comparisons test	Treatment: ****, P<0.0001 (S+V vs C+V); *, P=0.0479 (S+V vs C+G); ****, P<0.0001 (C+V vs C+G)			F (DFn, DFd)：0.8094 (2, 15)
		Sham+Vehicle Male	CCI+Vehicle Male	CCI+G-15 Male	6	6	6	one-way ANOVA with Turkey's multiple comparisons test	Treatment: ****, P<0.0001 (S+V vs C+V); ***, P=0.0002 (S+V vs C+G); **, P=0.0019 (C+V vs C+G)			F (DFn, DFd)：2.176 (2, 15)
	G	Sham+Vehicle	CCI+Vehicle	CCI+G-15	3	3	3	one-way ANOVA with Turkey's multiple comparisons test	**, P=0.0019 (S+V vs C+V); ns, P=0.8422 (S+V vs C+G); **, P=0.0030 (C+V vs C+G)			F (DFn, DFd)：0.1260 (2, 6)
	H	Sham+Vehicle	CCI+Vehicle	CCI+G-15	3	3	4	one-way ANOVA with Turkey's multiple comparisons test	***, P=0.0002 (S+V vs C+V); ns, P=0.6370 (S+V vs C+G); ***, P=0.0003 (C+V vs C+G)			F (DFn, DFd)：6.709 (2, 7)
	I	Sham+Vehicle	CCI+Vehicle	CCI+G-15	3	3	3	one-way ANOVA with Turkey's multiple comparisons test	*, P=0.0166 (S+V vs C+V); ns, P=0.5741 (S+V vs C+G); **, P=0.0055 (C+V vs C+G)			F (DFn, DFd)：0.3714 (2, 6)
	J	Sham+Vehicle	CCI+Vehicle	CCI+G-15	3	3	4	one-way ANOVA with Turkey's multiple comparisons test	*, P=0.044 (S+V vs C+V); *, P=0.0138 (S+V vs C+G); ***, P=0.0005 (C+V vs C+G)			F (DFn, DFd)：2.995 (2, 7)
Figure 1-supplement figure 1	A	Vehicle Female	G-15 Female		6	6		two-way ANOVA with Šídák's multiple comparisons test	Baseline: ns, P=0.9975	Treatment: ns, P=0.8548		F (1, 20) = 0.09771
		Vehicle Male	G-15 Male		6	6		two-way ANOVA with Šídák's multiple comparisons test	Baseline: ns, P=0.9690	Treatment: ns, P=0.8290		F (1, 20) = 0.3028
	B	Vehicle Female	G-15 Female		6	6		Unpaired Student's t-test	Treatment: ns, P=0.3911			t=0.8964, df=10
		Vehicle Male	G-15 Male		6	6		Unpaired Student's t-test	Treatment: ns, P=0.3670			t=0.9449, df=10
	C	Vehicle	G-15		6	6		two-way ANOVA with Šídák's multiple comparisons test	ns, P=0.9651 (BL); ns, P>0.9999 (CCI); **, P=0.0017 (0.5h); ****, P<0.0001 (1h); ****, P<0.0001 (2h); ****, P<0.0001 (6h); ns, P=0.8320 (24h);			F (6, 70) = 8.572
	D	Vehicle Female	G-1 Female		6	6		two-way ANOVA with Šídák's multiple comparisons test	Baseline: ns, P=0.9903	Treatment: ***, P=0.0003		F (1, 20) = 11.15
		Vehicle Male	G-1 Male		6	6		two-way ANOVA with Šídák's multiple comparisons test	Baseline: ns, P=0.7841	Treatment: ****, P<0.0001		F (1, 20) = 12.10
	E	Vehicle Female	G-1 Female		6	6		two-way ANOVA with Šídák's multiple comparisons test	Baseline: ns, P=0.9667	Treatment: ****, P<0.0001		F (1, 20) = 17.08
		Vehicle Male	G-1 Male		6	6		two-way ANOVA with Šídák's multiple comparisons test	Baseline: ns, P=0.8559	Treatment: ****, P<0.0001		F (1, 20) = 28.48
	F	Vehicle Female	G-1 Female		6	6		Unpaired Student's t-test	Treatment: ****, P<0.0001			t=7.819, df=10
		Vehicle Male	G-1 Male		6	6		Unpaired Student's t-test	Treatment: **, P=0.0016			t=4.272, df=10
	G	Vehicle	G-1		6	6		two-way ANOVA with Šídák's multiple comparisons test	ns, P=0.7111 (BL); *, P=0.0403 (0.5h); ***, P=0.0007 (1h); ****, P<0.0001 (2h); ****, P<0.0001 (6h); ****, P<0.0001 (24h); ****, P<0.0001 (48h)			F (6, 70) = 7.152
	I	Vehicle	G-1		3	3		Unpaired Student's t-test	**, P=0.003			t=5.211, df=4
	J	Vehicle	G-1		3	3		Unpaired Student's t-test	**, P=0.0065			t=6.426, df=4
