# Supplementary material for: GPR30 in spinal cholecystokinin-positive neurons modulates neuropathic pain
Source: eLife. 2025 Dec 23;13:RP102874. doi: 10.7554/eLife.102874 (PMC12726830; doi:10.7554/eLife.102874)
Supplement: Figure 2—source data 1. [file elife-102874-fig2-data1.xlsx]

## Sheet: Figure 2
B
Mice 1					Mice 2					Mice 3
Slice	GPR30	with slc32a1	with slc17a6		Slice	GPR30	with slc32a1	with slc17a6		Slice	GPR30	with slc32a1	with slc17a6
1	108	34	62		1	203	39	121		1	125	27	79
2	128	38	76		2	184	37	103		2	191	40	120
3	131	11	68		3	184	30	138		3	182	35	135
SUM	367	83	206		4	183	37	121		SUM	498	102	334
%		22.6158	56.1308		SUM	571	106	362		%		20.4819	67.0683
					%		18.5639	63.3975
G
Mice 1					Mice 2					Mice 3
Slice	CCK-tdT	GPR30	Overlap		Slice	CCK-tdT	GPR30	Overlap		Slice	CCK-tdT	GPR30	Overlap
1	108	147	88		1	110	189	97		1	125	197	113
2	93	157	82		2	91	138	78		2	92	162	81
3	92	164	82		3	146	206	128		3	106	198	98
SUM	293	468	252		SUM	347	533	303		SUM	323	557	292
%		86.0068	53.8462		%		87.3199	56.848		%		90.4025	52.4237

## Sheet: Figure 2-supplement figure 1
D
Male
Mice 1					Mice 2					Mice 3
Slice	% of Nissl	% of GFAP	% of IBA1		Slice	% of Nissl	% of GFAP	% of IBA1		Slice	% of Nissl	% of GFAP	% of IBA1
1	100	0	0		1	100	0	0		1	100	0	0
2	100	0	0		2	100	0	0		2	100	0	0
3	100	0	0		3	100	0	0		3	100	0	0
Female
Mice 1					Mice 2					Mice 3
Slice	% of Nissl	% of GFAP	% of IBA1		Slice	% of Nissl	% of GFAP	% of IBA1		Slice	% of Nissl	% of GFAP	% of IBA1
1	100	0	0		1	100	0	0		1	100	0	0
2	100	0	0		2	100	0	0		2	100	0	0
3	100	0	0		3	100	0	0		3	100	0	0

## Sheet: Figure 2-supplement figure 2
C
Mice 1				Mice 2				Mice 3
Slice	GPR30	with Camk2		Slice	GPR30	with Camk2		Slice	GPR30	with Camk2
1	57	54		1	71	60		1	54	46
2	83	80		2	87	76		2	49	45
3	76	68		3	75	65		3	52	51
SUM	216	202		SUM	233	201		SUM	155	142
%		93.5185		%		86.2661		%		91.6129

## Sheet: Figure 2-supplement figure 3
C-D
CCI
Mice 1				Mice 2				Mice 3
Slice	c-Fos	with tdT		Slice	c-Fos	with tdT		Slice	c-Fos	with tdT
1	32	8		1	18	4		1	9	3
2	23	6		2	23	7		2	11	5
3	25	5		3	17	3		3	11	4
4	12	5		4	11	4		4	33	5
5	34	5		5	38	7		5	27	6
6	12	3		6	42	7		6	43	6
7	18	3		7	41	7		7	27	5
8	22	3		8	26	3		SUM	161	34
9	33	8		9	26	9		%		21.118
SUM	211	46		SUM	242	51
%		21.8009		%		21.0744
Sham
Mice 1				Mice 2				Mice 2
Slice	c-Fos	with tdT		Slice	c-Fos	with tdT		Slice	c-Fos	with tdT
1	2	0		1	7	0		1	13	2
2	3	0		2	17	2		2	3	1
3	20	3		3	8	0		3	17	2
4	9	0		4	11	1		4	2	0
5	14	4		5	19	1		5	24	2
6	18	3		6	10	1		6	22	2
SUM	66	10		SUM	72	5		7	24	2
%		15.1515		%		6.94444		8	15	2
								SUM	120	13
								%		10.8333

## Sheet: Statistic analysis
Figure 2	B	Slc32a1	slc17a6		3	3		Unpaired Student's t-test	***, P=0.0003			t=12.18, df=4
Figure 2-supplement figure 3	C	Sham	CCI		3	3		Unpaired Student's t-test	**, P=0.0024			t=6.852, df=4
	D	Sham	CCI		3	3		Unpaired Student's t-test	*, P=0.0122			t=4.347, df=4
