# Supplementary material for: GPR30 in spinal cholecystokinin-positive neurons modulates neuropathic pain
Source: eLife. 2025 Dec 23;13:RP102874. doi: 10.7554/eLife.102874 (PMC12726830; doi:10.7554/eLife.102874)
Supplement: Figure 3—source data 1. [file elife-102874-fig3-data1.xlsx]

## Sheet: Figure 3
C
actin	Ct	Mean Ct	Gper1	Ct	Mean Ct	△Ct	2^(-△Ct）	2^(-△△Ct）		Group	concerntration
NC + Sham 1	18.1	18.16	NC + Sham 1	28.48	28.42	10.26	0.000815516	1.04909		NC + Sham 1	11.92
	18.1			28.35
	18.28			28.44
NC + Sham 2	18.29	18.46	NC + Sham 2	28.99	28.83	10.37	0.000755647	0.972074		NC + Sham 2	65.44
	18.59			28.69
	18.51			28.82
NC + Sham 3	17.81	18.02	NC + Sham 3	28.33	28.38	10.36	0.000760903	0.978836		NC + Sham 3	28.56
	18.15			28.5
	18.09			28.31
KD + CCI 1	17.88	18.03	KD + CCI 1	28.36	28.36	10.33	0.000776891	0.999403		KD + CCI 1	50.64
	18.27			28.47
	17.93			28.25
KD + CCI 2	18.01	18.12	KD + CCI 2	28.18	28.17	10.05	0.000943297	1.21347		KD + CCI 2	43.76
	18.37			28.22
	17.97			28.11
KD + CCI 3	18.22	18.22	KD + CCI 3	28.54	28.43	10.21	0.000844275	1.08609		KD + CCI 3	12.72
	18.21			28.4
	18.23			28.36
KD + CCI 4	18.15	18.12	KD + CCI 4	28.39	28.39	10.27	0.000809882	1.04184		KD + CCI 4	80.4
	18.1			28.32
	18.1			28.46
NC + CCI 1	18.34	18.33	NC + CCI 1	27.97	27.93	9.6	0.00128858	1.65765		NC + CCI 1	16.96
	18.33			27.8
	18.32			28.03
NC + CCI 2	17.91	17.92	NC + CCI 2	27.89	27.84	9.92	0.00103224	1.32789		NC + CCI 2	32.32
	17.92			27.78
	17.94			NA
NC + CCI 3	18.25	18.27	NC + CCI 3	28.45	28.21	9.94	0.00101803	1.30961		NC + CCI 3	47.36
	18.31			27.74
	18.25			28.46
					Mean Sham		0.000777355
D-F
Female
VF	Scramble + Sham						Scramble + CCI						shGper1 + CCI
Baseline	0.4	0.33	0.4	0.98	0.33	0.27	0.51	0.33	0.75	0.19	0.51	0.4	0.51	0.4	0.23	0.23	0.44	0.23	0.51
shRNA	0.75	0.4	0.36	0.4	0.27	0.65	0.65	0.33	0.4	0.32	0.98	0.33	0.75	0.65	0.4	0.65	0.51	0.65	0.65
CCI 2W	0.4	0.32	0.51	0.4	0.36	0.4	0.05	0.03	0.03	0.02	0.06	0.03	0.51	0.51	0.23	0.1	0.27	0.98	0.29
Brush	Scramble + Sham						Scramble + CCI						shGper1 + CCI
Baseline	20	20	20	0	10	20	20	10	10	30	20	10	20	10	10	20	30	10	20
shRNA	20	20	0	20	20	20	10	30	10	40	20	30	0	20	20	10	30	0	20
CCI 2W	0	10	30	10	20	10	80	70	70	70	70	90	10	20	30	30	20	0	30
Heat	Scramble + Sham						Scramble + CCI						shGper1 + CCI
1st	8.25	10.27	11.2	6.47	9.38	9.76	7.99	3.55	4.57	3.73	6.57	3.98	10.07	7.32	9.63	6.39	2.43	12.18	8.92
2nd	10.54	9.33	10.85	8.47	8.61	9.74	5.49	3.98	6.03	2.66	8.74	4.12	8.52	7.8	8.28	6.82	9.72	15.01	5.97
3rd	8.95	9.16	10.39	7.56	7.99	10.89	6.42	4.38	4.87	2.44	7.21	6.97	11.68	9.47	7.98	8.98	5.53	8.47	8.23
Mean	9.25	9.59	10.81	7.5	8.66	10.13	6.63	3.97	5.16	2.94	7.51	5.02	10.09	8.2	8.63	7.4	5.89	11.89	7.71
Male
VF	Scramble + Sham						Scramble + CCI						shGper1 + CCI
Baseline	0.51	0.36	0.4	0.59	0.4	0.65	0.51	0.4	0.98	0.51	0.75	0.51	0.65	0.75	0.51	0.19	0.4	0.75	0.4
shRNA	0.4	0.75	0.29	0.51	0.75	0.51	0.98	0.65	0.44	0.4	0.65	0.33	0.65	0.47	0.65	0.65	0.59	0.47	0.51
CCI 2W	0.47	0.69	0.4	0.75	0.36	0.65	0.02	0.06	0.03	0.02	0.05	0.02	0.65	0.23	0.27	0.33	0.29	0.59	0.23
Brush	Scramble + Sham						Scramble + CCI						shGper1 + CCI
Baseline	10	20	10	20	20	0	10	30	10	20	20	0	30	0	20	30	30	0	20
shRNA	0	20	20	30	20	0	20	0	20	0	0	20	20	0	0	0	20	20	30
CCI 2W	0	10	20	20	30	20	90	80	60	70	80	80	20	20	10	30	20	30	40
Heat	Scramble + Sham						Scramble + CCI						shGper1 + CCI
1st	13.01	11.51	8.1	10.17	15.05	15.47	8.23	6.46	5.58	2.41	5.85	3.8	12.09	11.16	5.35	7.78	13.45	8.57	9.05
2nd	12.82	9.14	12.68	9.11	9.51	9.5	4.78	6.01	5.26	3.26	7.82	7.81	8.2	10.63	6.99	13.56	5.91	7.44	6.62
3rd	10.81	12.26	8.75	8.85	16.59	10.63	3.68	5.57	4.09	6.34	7.83	5.94	9.98	8.01	6.95	10.66	6.93	9.02	7.12
Mean	12.21	10.97	9.84	9.38	13.72	11.87	5.56	6.01	4.98	4	7.17	5.85	10.09	9.93	6.43	10.67	8.76	8.34	7.6

## Sheet: statistic analysis
Figure 3	C	Scramble + Sham	Scramble + CCI	shGper1 + CCI	3	3	4	one-way ANOVA with Turkey's multiple comparisons test	**, P=0.0088 (Sc+S vs Sc+C); ns, P=0.6538 (Sc+S vs sh+C); *, P=0.0187 (Sc+C vs sh+C)			F (DFn, DFd)：0.5232 (2, 7)
	D	Scramble + Sham Female	Scramble + CCI Female	shGper1 + CCI Female	6	6	7	two-way ANOVA with Turkey's multiple comparisons test	Baseline: ns, P=0.9995 (Sc+S vs Sc+C); ns, P=0.6934 (Sc+S vs sh+C); ns, P=0.7125 (Sc+C vs sh+C)	shRNA: ns, P=0.9604 (Sc+S vs Sc+C); ns, P=0.4118 (Sc+S vs sh+C); ns, P=0.5795 (Sc+C vs sh+C)"	CCI-2W: **, P=0.0056 (Sc+S vs Sc+C); ns, P=0.9898 (Sc+S vs sh+C); **, P=0.0027 (Sc+C vs sh+C)"	F (4, 48) = 3.198
		Scramble + Sham Male	Scramble + CCI Male	shGper1 + CCI Male	6	6	7	two-way ANOVA with Turkey's multiple comparisons test	Baseline: ns, P=0.4148 (Sc+S vs Sc+C); ns, P=0.9212 (Sc+S vs sh+C); ns, P=0.6185 (Sc+C vs sh+C)	shRNA: ns, P=0.9122 (Sc+S vs Sc+C); ns, P=0.9270 (Sc+S vs sh+C); ns, P=0.9985 (Sc+C vs sh+C)"	CCI-2W: ****, P<0.0001 (Sc+S vs Sc+C); ns, P=0.1375 (Sc+S vs sh+C); **, P=0.0023 (Sc+C vs sh+C)"	F (4, 48) = 6.616
	E	Scramble + Sham Female	Scramble + CCI Female	shGper1 + CCI Female	6	6	7	two-way ANOVA with Turkey's multiple comparisons test	Baseline: ns, P=0.9527 (Sc+S vs Sc+C); ns, P=0.9175 (Sc+S vs sh+C); ns, P=0.9957 (Sc+C vs sh+C)	shRNA: ns, P=0.4670 (Sc+S vs Sc+C); ns, P=0.8992 (Sc+S vs sh+C); ns, P=0.2268 (Sc+C vs sh+C)"	CCI-2W: ****, P<0.0001 (Sc+S vs Sc+C); ns, P=0.4410 (Sc+S vs sh+C); ****, P<0.0001 (Sc+C vs sh+C)"	F (4, 48) = 21.59
		Scramble + Sham Male	Scramble + CCI Male	shGper1 + CCI Male	6	6	7	two-way ANOVA with Turkey's multiple comparisons test	Baseline: ns, P=0.9633 (Sc+S vs Sc+C); ns, P=0.6745 (Sc+S vs sh+C); ns, P=0.8319 (Sc+C vs sh+C)	shRNA: ns, P=0.7163 (Sc+S vs Sc+C); ns, P=0.9357 (Sc+S vs sh+C); ns, P=0.8887 (Sc+C vs sh+C)"	CCI-2W: ****, P<0.0001 (Sc+S vs Sc+C); ns, P=0.4386 (Sc+S vs sh+C); ****, P<0.0001 (Sc+C vs sh+C)"	F (4, 48) = 19.35
	F	Scramble + Sham Female	Scramble + CCI Female	shGper1 + CCI Female	6	6	7	one-way ANOVA with Turkey's multiple comparisons test	CCI-2W: **, P=0.0014 (Sc+S vs Sc+C); ns, P=0.6788 (Sc+S vs sh+C); **, P=0.0059 (Sc+C vs sh+C)"			F (DFn, DFd)：0.4076 (2, 16)
		Scramble + Sham Male	Scramble + CCI Male	shGper1 + CCI Male	6	6	7	one-way ANOVA with Turkey's multiple comparisons test	CCI-2W: ****, P<0.0001 (Sc+S vs Sc+C); *, P=0.0157 (Sc+S vs sh+C); **, P=0.0023 (Sc+C vs sh+C)			F (DFn, DFd)：0.8018 (2, 16)
	J	Pre	Stim	Post	8	8	8	one-way ANOVA with Turkey's multiple comparisons test	**, P=0.0012 (Pre vs Stim); ***, P=0.0006 (Pre vs Post); *, P=0.9508 (stim vs post)			F (DFn, DFd)：9.576 (2, 21)
	K	Pre	Stim	Post	8	8	8	one-way ANOVA with Turkey's multiple comparisons test	ns, P=0.6875 (Pre vs Stim); ns, P=0.9906 (Pre vs Post); ns, P=0.6076 (stim vs post)			F (DFn, DFd)：2.262 (2, 21)
	L	Pre	Stim	Post	8	8	8	Unpaired Student's t-test	***, P=0.0002			t=4.938, df=14
