# Supplementary material for: GPR30 in spinal cholecystokinin-positive neurons modulates neuropathic pain
Source: eLife. 2025 Dec 23;13:RP102874. doi: 10.7554/eLife.102874 (PMC12726830; doi:10.7554/eLife.102874)
Supplement: Figure 4—source data 1. [file elife-102874-fig4-data1.xlsx]

## Sheet: Figure 4
D-E
Group	Amp (pA)	Frequency (Hz)
Scramble + Sham 1	15.38	6.58
Scramble + Sham 2	11.9	3.094
Scramble + Sham 3	14.16	3.108
Scramble + Sham 4	15.1	3.518
Scramble + Sham 5	10.86	3.222
Scramble + Sham 6	9.64	1.848
Scramble + Sham 7	15.63	4.204
Scramble + Sham 8	13.73	6.222
Scramble + Sham 9	13.37	5.421
Scramble + Sham 10	13.79	3.494
Scramble + Sham 11	13.98	2.156
Scramble + Sham 12	12.15	2.155
Scramble + Sham 13	9.52	3.862
Scramble + CCI 1	22.4	3.939
Scramble + CCI 2	25.27	3.163
Scramble + CCI 3	22.28	8.616
Scramble + CCI 4	12.63	1.286
Scramble + CCI 5	23.19	1.911
Scramble + CCI 6	11.72	3.033
Scramble + CCI 7	20.75	2.389
Scramble + CCI 8	12.39	2.836
Scramble + CCI 9	11.96	5.443
Scramble + CCI 10	36.56	4.298
Scramble + CCI 11	15.14	5.535
Scramble + CCI 12	10.19	6.661
Scramble + CCI 13	18.55	6.7
Scramble + CCI 14	18.37	7.296
Scramble + CCI 15	16.11	4.537
Scramble + CCI 16	13.98	4.139
shGper1 + CCI 1	6.1	0.845
shGper1 + CCI 2	13.43	2.457
shGper1 + CCI 3	14.71	3.441
shGper1 + CCI 4	10.74	1.226
shGper1 + CCI 5	12.57	3.638
shGper1 + CCI 6	13.79	2.572
shGper1 + CCI 7	11.84	5.224
shGper1 + CCI 8	12.94	4.691
shGper1 + CCI 9	9.28	3.357
shGper1 + CCI 10	7.2	2.375
shGper1 + CCI 11	20.57	3.787
I
Cell-1	Basal	G-1	Cell-2	Basal	G-1	Cell-3	Basal	G-1	Cell-4	Basal	G-1	Cell-5	Basal	G-1	Cell-6	Basal	G-1	Cell-7	Basal	G-1	Cell-8	Basal	G-1	Cell-9	Basal	G-1
1	49.892	95.181	1	100.79	245.78	1	26.125	70.5	1	71.981	62.535	1	67.52	171.48	1	208.42	218.61	1	86.861	338.29	1	262.44	267.12	1	317.9	364.29
2	15.745	20.376	2	107.29	208.24	2	26.871	43.182	2	22.413	72.375	2	61.748	113.19	2	164.94	239.14	2	70.325	258.38	2	222.35	261.51	2	288.68	263.23
3	27.792	53.358	3	79.612	153.43	3	22.536	36.517	3	57.078	67.681	3	81.165	139.21	3	172.19	251.82	3	85.035	388.11	3	163.1	293.08	3	207.61	308.69
4	38.786	50.139	4	59.666	248.58	4	24.747	34.258	4	70.73	81.036	4	50.129	151.04	4	177.13	189.3	4	156.12	276.35	4	265.04	282.67	4	291.68	347.51
5	32.83	75.155	5	90.739	178.51	5	24.022	34.964	5	57.851	67.745	5	72.145	162.48	5	175.74	209.73	5	161.09	147.82	5	225.32	272.65	5	268.03	303.19
6	29.188	27.19	6	69.957	203.73	6	27.699	31.586	6	58.058	78.875	6	90.204	149.67	6	168.29	208.98	6	82.903	194.23	6	224.22	314.8	6	288.8	323.62
7	37.756	35.617	7	115.9	219.89	7	24.415	28.204	7	68.069	62.627	7	116.6	146.24	7	185.71	206.78	7	186.72	294.09	7	232.24	268.81	7	256.03	286.61
8	9.6739	20.81	8	43.227	173.39	8	27.807	34.959	8	52.071	60.314	8	121.4	148.12	8	192.08	207.01	8	79.927	141.52	8	220.73	246.15	8	275.51	321.62
9	21.11	30.932	9	74.268	206.74	9	26.613	35.344	9	65.992	58.191	9	168.43	133.18	9	173.22	214.66	9	81.59	144.44	9	219.73	221.76	9	266.25	306.52
10	68.027	44.681	10	74.884	194.78	10	27.18	31.671	10	77.171	58.198	10	168.08	148.81	10	179.8	173.46	10	97.124	138.33	10	220.47	186.05	10	258.34	287.42
Mean	33.08	45.3439	Mean	81.6333	203.307	Mean	25.8015	38.1185	Mean	60.1414	66.9577	Mean	99.7421	146.342	Mean	179.752	211.949	Mean	108.77	232.156	Mean	225.564	261.46	Mean	271.883	311.27

## Sheet: Figure 4-supplement figure 1
C-D
Group	Amp (pA)	Frequency (Hz)
shGper1 + CCI 1	39.86	4.629
shGper1 + CCI 2	18.1	0.758
shGper1 + CCI 3	20.87	1.591
shGper1 + CCI 4	15.5	3.03
shGper1 + CCI 5	19.96	6.01
shGper1 + CCI 6	9.03	0.59
shGper1 + CCI 7	27.1	7.63
shGper1 + CCI 8	12.51	1.668
shGper1 + CCI 9	20.02	3.508
shGper1 + CCI 10	29.66	2.014
shGper1 + CCI 11	20.45	1.516
shGper1 + CCI 12	35.16	3.267
shGper1 + CCI 13	21.18	6.012
shGper1 + CCI 14	27.04	2.316
shGper1 + CCI 15	11.29	0.322
shGper1 + CCI 16	16.24	1.008
Scramble + CCI 1	20.14	7.207
Scramble + CCI 2	29.05	1.584
Scramble + CCI 3	19.9	1.607
Scramble + CCI 4	28.93	5.347
Scramble + CCI 5	31.86	3.46
Scramble + CCI 6	22.95	1.794
Scramble + CCI 7	14.22	1.025
Scramble + CCI 8	20.57	1.464
Scramble + CCI 9	15.01	0.423
Scramble + CCI 10	27.04	2.779
Scramble + CCI 11	17.64	1.656
Scramble + CCI 12	11.41	2.594

## Sheet: Statistic analysis
Figure 4	D	Scramble + Sham	Scramble + CCI	shGper1 + CCI	13	16	11	one-way ANOVA with Turkey's multiple comparisons test	ns, P=0.5062 (Sc+S vs Sc+C); ns, P=0.5824 (Sc+S vs sh+C); ns, P=0.0994(Sc+C vs sh+C)			F (DFn, DFd)：1.458 (2, 37)
	E	Scramble + Sham	Scramble + CCI	shGper1 + CCI	13	16	11	one-way ANOVA with Turkey's multiple comparisons test	*, P=0.0201 (Sc+S vs Sc+C); ns, P=0.8945 (Sc+S vs sh+C); **, P=0.0085(Sc+C vs sh+C)"			F (DFn, DFd)：4.917 (2, 37)
	I	Basal	G-1		9	9		Paired Student's t-test	*, P=0.0121			t=3.226, df=8
Figure 4-supplement figure 1	C	Scramble + CCI	shGper1 + CCI		16	12		Unpaired Student's t-test	ns, P=0.7203			t=0.3620, df=26
	D	Scramble + CCI	shGper1 + CCI		16	12		Unpaired Student's t-test	ns, P=0.9834			t=0.02103, df=26
