# Supplementary material for: GPR30 in spinal cholecystokinin-positive neurons modulates neuropathic pain
Source: eLife. 2025 Dec 23;13:RP102874. doi: 10.7554/eLife.102874 (PMC12726830; doi:10.7554/eLife.102874)
Supplement: Figure 5—source data 1. [file elife-102874-fig5-data1.xlsx]

## Sheet: Figure 5
J
Mice 1			Mice 2			Mice 3
Slice	EGFP+	Double labeled	Slice	EGFP+	Double labeled	Slice	EGFP+	Double labeled
1	17	4	1	26	7	1	16	3
2	15	3	2	14	7	2	21	5
3	19	4	3	18	7	Mean	18.5	4
Mean	17	3.66667	Mean	19.3333	7	% of EGFP+ cells		21.6216
% of EGFP+ cells		21.5686	% of EGFP+ cells		36.2069
N
Mice 1			Mice 2			Mice 3
Slice	EGFP+	Double labeled	Slice	EGFP+	Double labeled	Slice	EGFP+	Double labeled
1	3	2	1	4	4	1	3	2
2	4	4	2	4	3	2	3	2
3	4	2	3	2	1	3	5	4
4	3	2	4	7	6	4	2	2
5	4	4	5	5	5	5	3	3
6	3	3	6	2	2	6	2	1
7	3	3	7	2	0	7	5	4
8	2	2	8	2	2	Mean	3.28571	2.57143
9	3	1	9	2	1	% of EGFP+ cells		78.2609
10	4	3	10	2	2
11	7	7	11	1	1
12	4	4	12	2	2
13	2	2	13	1	1
14	3	3	14	1	1
Mean	3.5	3	15	5	4
% of EGFP+ cells		85.7143	16	3	2
			17	3	3
			18	5	3
			Mean	2.94444	2.38889
			% of EGFP+ cells		81.1321
