# Supplementary material for: GPR30 in spinal cholecystokinin-positive neurons modulates neuropathic pain
Source: eLife. 2025 Dec 23;13:RP102874. doi: 10.7554/eLife.102874 (PMC12726830; doi:10.7554/eLife.102874)
Supplement: Figure 6—source data 1. [file elife-102874-fig6-data1.xlsx]

## Sheet: Figure 6
B
Group	0-10 min	10-20 min	0-20 min
NC 1	151.21	117.29	268.5
NC 2	64.66	52.3	116.96
Gq 1	3.96	2.73	6.69
Gq 2	2.85	0.39	3.24
NC 3	20.23	51.22	71.45
NC 4	37.72	71.59	109.31
Gq 3	8.59	6.9	15.49
Gq 4	12.09	43.49	55.58
NC 5	38.15	38.09	76.24
NC 6	19.57	39.87	59.44
Gq 5	14.07	12.69	26.76
Gq 6	2.5	6.36	8.86
C-E
Female
VF	NC + Vehicle						Gq + Vehicle						Gq + G-15
Baseline	0.4783	0.421745	0.414668	0.4783	0.439036	0.27227	0.72884	0.319889	0.4783	0.549794	0.27227	0.320922	0.27227	0.616027	0.449728	0.319889	0.249172	0.320922
Treatment	0.27227	0.324228	0.4783	0.549794	0.4783	0.319889	0.241018	0.00605271	0.0177011	0.0177011	0.00605271	0.0259358	0.299364	0.414668	0.414668	0.208521	0.35	0.421745
Brush	NC + Vehicle						Gq + Vehicle						Gq + G-15
Baseline	20	20	30	10	10	0	10	10	20	20	0	40	20	20	10	30	10	30
Treatment	40	20	20	20	20	10	40	70	80	60	100	100	20	10	30	10	30	30
Heat	NC + Vehicle						Gq + Vehicle						Gq + G-15
1st	6.9	15.1	14.4	7.8	8.2	15.1	8.7	2.9	4.7	5.2	5.9	4.8	6.9	7.9	7.7	5.9	7.5	9.3
2nd	7.3	7.5	7.1	10.2	7.7	7.4	6.9	2.7	5.5	3.9	5.1	4.2	12.9	7.1	10.9	8.4	8.9	6.9
3rd	5.9	6.9	6.4	8.1	7.2	5.9	7.5	2.6	4.9	4.1	4.1	3.1	6.8	7.5	8.3	7.7	7.2	8.2
Mean	6.7	9.83	9.3	8.7	7.7	9.47	7.7	2.73	5.03	4.4	5.03	4.03	8.87	7.5	8.97	7.33	7.87	8.13
Male
VF	NC + Vehicle							Gq + Vehicle							Gq + G-15
Baseline	0.98	0.29	0.65	0.47	0.44	0.65	0.51	0.51	0.4	0.4	0.98	0.4	0.4	0.44	0.98	0.69	0.59	0.51	0.98	0.65	0.51
Treatment	0.98	0.65	0.98	0.91	0.44	0.65	0.51	0.13	0.06	0.08	0.04	0.06	0.04	0.05	0.29	0.59	0.4	0.4	0.27	0.65	0.75
Brush	NC + Vehicle							Gq + Vehicle							Gq + G-15
Baseline	20	40	10	10	20	10	20	20	30	10	10	20	20	0	10	40	20	10	0	10	30
Treatment	20	10	20	0	10	0	20	80	60	100	90	80	90	80	40	10	20	30	60	20	10
Heat	NC + Vehicle							Gq + Vehicle							Gq + G-15
1st	12.5	12.5	10.2	13.7	10.6	8.6	10.4	5.7	5.8	5.7	6.3	5.4	6.2	5.8	10.9	8.9	11.1	13.2	9.3	8.6	9.3
2nd	11.7	13.6	10.3	11.9	10.1	8.9	12.1	4.2	3.2	5.2	5.2	4.6	6.1	5.3	10.8	8.8	10.7	10.2	8.5	8.2	8.6
3rd	11.4	10.1	8.8	10.9	8.6	7.2	8.6	3.1	2.9	4.1	4.1	4.2	5.2	4.1	8.9	10.1	9.2	10.3	8.8	7.9	8.1
Mean	11.87	12.07	9.77	12.17	9.77	8.23	10.37	4.33	3.97	5	5.2	4.73	5.83	5.07	10.2	9.27	10.33	11.23	8.87	8.23	8.67
G-H
NC + Vehicle									Gq + Vehicle									Gq + G-15
Mice 1			Mice 2			Mice 3			Mice 1			Mice 2			Mice 3			Mice 1			Mice 2			Mice 3
Slice	c-Fos	Double labeled	Slice	c-Fos	Double labeled	Slice	c-Fos	Double labeled	Slice	c-Fos	Double labeled	Slice	c-Fos	Double labeled	Slice	c-Fos	Double labeled	Slice	c-Fos	Double labeled	Slice	c-Fos	Double labeled	Slice	c-Fos	Double labeled
1	21	10	1	15	6	1	19	8	1	38	23	1	45	30	1	36	20	1	6	1	1	18	2	1	9	1
2	13	3	2	12	4	2	18	5	2	44	31	2	48	33	2	37	23	2	11	2	2	12	1	2	8	0
3	15	4	3	18	8	3	22	6	3	32	20	3	41	27	3	31	18	3	11	1	3	13	2	3	13	1
Mean	16.3333	5.66667	Mean	15	6	Mean	19.6667	6.33333	Mean	38	24.6667	Mean	44.6667	30	Mean	34.6667	20.3333	Mean	9.33333	1.33333	Mean	14.3333	1.66667	Mean	10	0.666667
% of c-Fos		34.6939	% of c-Fos		40	% of c-Fos		32.2034	% of c-Fos		64.9123	% of c-Fos		67.1642	% of c-Fos		58.6538	% of c-Fos		14.2857	% of c-Fos		11.6279	% of c-Fos		6.66667

## Sheet: Figure 6-supplement figure 1
B-D
VF	NC + Sham						NC + CCI						Gi + CCI
Baseline	0.363	0.55	0.422	0.32	0.558	0.374	0.35	0.356	0.209	0.835	0.272	0.45	0.299	0.616	0.32	0.478	0.45	0.478
Treatment	0.363	0.55	0.415	0.272	0.511	0.511	0.028	0.02	0.026	0.02	0.02	0.034	0.353	0.439	0.28	0.283	0.462	0.353
Brush	NC + Sham						NC + CCI						Gi + CCI
Baseline	10	10	20	10	20	30	20	20	10	10	30	30	10	10	30	0	10	10
Treatment	20	10	20	0	40	20	90	60	80	80	80	100	20	40	20	20	20	0
Heat	NC + Sham						NC + CCI						Gi + CCI
1st	7.4	7.6	10.3	7.4	7.5	5.9	3.9	3.9	1.8	1.8	2.4	2.5	3.9	3.3	7.7	4.1	3.6	3.7
2nd	10.1	7.3	5.4	5.3	6.5	6.6	2.7	3.2	2.3	2.8	3.1	2.3	10.9	3.4	5.1	3.1	5.3	5.2
3rd	7.6	8.1	5.2	5.3	4.5	6.9	2.57	3.2	2.67	2.4	2.8	2.67	6.1	3.2	6.1	6.2	4.2	3.5
Mean	8.37	7.67	6.97	6	6.17	6.47	2.57	3.2	2.67	2.4	2.8	2.67	6.97	3.3	6.3	4.47	4.37	4.13

## Sheet: Statisttic analysis
Figure 6	B	NC + CNO	Gq + CNO		6	6		Unpaired Student's t-test	*, P=0.0136			t=2.988, df=10
	C	NC + Vehicle female	Gq + Vehicle female	Gq + G-15 female	6	6	6	two-way ANOVA with Turkey's multiple comparisons test	Baseline: ns, P=0.9107 (N+V vs G+V); P=0.7908 (N+V vs G+G); P=0.5408 (G+V vs G+G)	Treatment: ****, P<0.0001 (N+V vs G+V); ns, P=0.7199 (N+V vs G+G); ***, p=0.0005 (G+V vs G+G)		F (2, 30) = 9.816
		NC + Vehicle male	Gq + Vehicle male	Gq + G-15 male	7	7	7	two-way ANOVA with Turkey's multiple comparisons test	Baseline: ns, P=0.7984 (N+V vs G+V); P=0.4140 (N+V vs G+G); P=0.1466 (G+V vs G+G)	Treatment: ****, P<0.0001 (N+V vs G+V); *, P=0.0474 (N+V vs G+G); ***, P=0.0008 (G+V vs G+G)		F (2, 36) = 8.797
	D	NC + Vehicle female	Gq + Vehicle female	Gq + G-15 female	6	6	6	two-way ANOVA with Turkey's multiple comparisons test	Baseline: ns, P=0.9757 (N+V vs G+V); P=0.8028 (N+V vs G+G); P=0.9066 (G+V vs G+G)	Treatment: ****, P<0.0001 (N+V vs G+V); ns, P>0.9999 (N+V vs G+G); ****, P<0.0001(G+V vs G+G)		F (2, 30) = 15.82
		NC + Vehicle male	Gq + Vehicle male	Gq + G-15 male	7	7	7	two-way ANOVA with Turkey's multiple comparisons test	Baseline: ns, P=0.9067 (N+V vs G+V); P=0.9758 (N+V vs G+G); P=0.9758 (G+V vs G+G)	Treatment: ****, P<0.0001 (N+V vs G+V); ns, P=0.0655 (N+V vs G+G); ****, P<0.0001(G+V vs G+G)		F (2, 36) = 33.03
	E	NC + Vehicle female	Gq + Vehicle female	Gq + G-15 female	6	6	6	one-way ANOVA with Turkey's multiple comparisons test	Treatment: ***, P=0.0002 (N+V vs G+V); ns, P=0.7643 (N+V vs G+G); ***, P=0.0010(G+V vs G+G)			F (DFn, DFd)：0.7172 (2, 15)
		NC + Vehicle male	Gq + Vehicle male	Gq + G-15 male	7	7	7	one-way ANOVA with Turkey's multiple comparisons test	Treatment: ****, P<0.0001 (N+V vs G+V); ns, P=0.2028 (N+V vs G+G); ****, P<0.0001(G+V vs G+G)			F (DFn, DFd)：2.554 (2, 18)
	G	NC + Vehicle	Gq + Vehicle	Gq + G-15	3	3	3	one-way ANOVA with Turkey's multiple comparisons test	***, P=0.0007 (N+V vs G+V); ns, P=0.2027 (N+V vs G+G); ***, P=0.0002 (G+V vs G+G)			F (DFn, DFd)：0.4608 (2, 6)
	H	NC + Vehicle	Gq + Vehicle	Gq + G-15	3	3	3	one-way ANOVA with Turkey's multiple comparisons test	***, P=0.0004 (N+V vs G+V); ***, P=0.0008 (N+V vs G+G); ****, P<0.0001(G+V vs G+G)			F (DFn, DFd)：0.009568 (2, 6)
Figure 6-supplement figure 1	B	NC + sham	NC + CCI	Gi + CCI	6	6	6	two-way ANOVA with Turkey's multiple comparisons test	Baseline: ns, P=0.9706 (N+S vs N+C); P=0.9855 (N+S vs G+C); P=0.9175 (N+C vs G+C)	Treatment: ****, P<0.0001 (N+S vs N+C); ns, P=0.5388 (N+S vs G+C); ***, P=0.0002 (N+C vs G+C)		F (2, 30) = 8.392
	C	NC + sham	NC + CCI	Gi + CCI	6	6	6	two-way ANOVA with Turkey's multiple comparisons test	Baseline: ns, P=0.8651 (N+S vs N+C); P=0.7233 (N+S vs G+C); P=0.4143 (N+C vs G+C)	Treatment: ****, P<0.0001 (N+S vs N+C); ns, P=0.9643 (N+S vs G+C); ****, P<0.0001 (N+C vs G+C)		F (2, 30) = 25.73
	D	NC + sham	NC + CCI	Gi + CCI	6	6	6	one-way ANOVA with Turkey's multiple comparisons test	Treatment: ****, P<0.0001 (N+S vs N+C); **, P=0.0076 (N+S vs G+C); **, P=0.0079 (N+C vs G+C)			F (DFn, DFd)：2.217 (2, 15)
