# Supplementary material for: GPR30 in spinal cholecystokinin-positive neurons modulates neuropathic pain
Source: eLife. 2025 Dec 23;13:RP102874. doi: 10.7554/eLife.102874 (PMC12726830; doi:10.7554/eLife.102874)
Supplement: Figure 7—source data 1. [file elife-102874-fig7-data1.xlsx]

## Sheet: Figure 7
B-D
Female
VF	Scramble + Sham						Scramble + CCI							shGper1 + CCI
Baseline	0.21	0.42	0.21	0.44	0.17	0.24	0.25	0.36	0.27	0.41	0.27	0.32	0.45	0.13	0.48	0.37	0.36	0.21	0.35
Treatment	0.4	0.29	0.36	0.59	0.29	0.4	0.02	0.12	0.03	0.03	0.02	0.02	0.07	0.33	0.19	0.32	0.2	0.07	0.4
Brush	Scramble + Sham						Scramble + CCI							shGper1 + CCI
Baseline	0	10	30	30	20	10	40	20	20	0	30	30	10	30	20	20	10	30	20
Treatment	30	10	50	30	30	30	60	70	100	70	50	80	100	60	10	40	40	60	40
Heat	Scramble + Sham						Scramble + CCI							shGper1 + CCI
1st	10.93	6.8	6.57	12	4.89	12.03	4.68	3.15	4.14	3.1	6.78	5.78	7.49	7.1	5.8	7.72	3.74	3.34	3.47
2nd	8.86	6.05	8.54	11.61	5.51	8.47	4.22	2.57	2.41	2.41	2.94	5.81	6.47	12.01	7.51	12.94	8.09	4.04	10.72
3rd	8.85	6.42	7.47	8.18	8.8	8.82	4.9	4.33	2.8	3.44	7.16	2.18	5.21	8.63	5.82	4.93	8.69	6.28	5.17
Mean	9.55	6.42	7.53	10.6	6.4	9.77	4.6	3.35	3.12	2.98	5.63	4.59	6.39	9.25	6.38	8.53	6.84	4.55	6.45
Male
VF	Scramble + Sham							Scramble + CCI							shGper1 + CCI
Baseline	0.98	0.69	0.59	0.4	0.51	0.4	0.59	0.47	0.32	0.98	0.4	0.47	0.27	0.75	0.33	0.51	0.32	0.69	0.44	0.65	0.75	0.59
Treatment	0.98	0.59	0.75	0.51	0.65	0.59	0.98	0.13	0.1	0.06	0.09	0.1	0.29	0.27	0.47	0.65	0.4	0.65	0.4	0.65	0.4	0.4
Brush	Scramble + Sham							Scramble + CCI							shGper1 + CCI
Baseline	10	10	20	30	10	0	0	10	10	20	0	20	30	30	10	20	20	10	10	0	20	30
Treatment	0	10	10	30	0	0	20	50	70	70	50	40	60	70	20	10	30	20	30	10	30	30
Heat	Scramble + Sham							Scramble + CCI							shGper1 + CCI
1st	12.1	13.6	12.8	15.1	11.5	15.1	13.8	8.7	7.6	5.3	5.9	7.5	7.3	4.6	12.1	10.9	8.7	7.3	10.9	13.1	6.9	11.2
2nd	12.1	13.1	11.9	13.4	10.9	15.1	13.2	7.9	8.1	5.1	5.9	6.2	6.9	4.1	10.8	9.8	8.9	6.9	10.1	13	5.9	9.8
3rd	11.5	12.5	1.5	13.1	10.1	14.1	12.8	6.1	6.5	4.2	5.3	6	6.6	3.5	10.1	7.9	7.1	6.1	8.6	11.8	5.3	8.6
Mean	11.9	13.07	8.73	13.87	10.83	14.77	13.27	7.57	7.4	4.87	5.7	6.57	6.93	4.07	11	9.53	8.23	6.77	9.87	12.63	6.03	9.87
F
actin	Ct	Mean Ct	Gper1	Ct	Mean Ct	△Ct	2^(-△Ct）	2^(-△△Ct）			Group	concerntration
NC + Sham 1	20.67	20.8033	NC + Sham 1	30.54	30.75	9.94667	0.00101334	1.21415			NC + Sham 1	19.36
	20.83			30.76
	20.91			30.95
NC + Sham 2	20.36	20.4533	NC + Sham 2	30.63	30.8467	10.3933	0.000743524	0.890863			NC + Sham 2	25.36
	20.42			30.85
	20.58			31.06
NC + Sham 3	20.49	20.5933	NC + Sham 3	30.87	30.98	10.3867	0.000746968	0.89499			NC + Sham 3	15.92
	20.57			31.03
	20.72			31.04
NC + CCI 1	20.67	20.71	KD + CCI 1	30.21	30.4233	9.71333	0.00119123	1.42729			NC + CCI 1	19.6
	20.69			30.41
	20.77			30.65
NC + CCI 2	20.73	20.75	KD + CCI 2	30.64	30.7067	9.95667	0.00100634	1.20576			NC + CCI 2	35.92
	20.77			30.64
	20.75			30.84
NC + CCI 3	20.46	20.54	KD + CCI 3	30.05	30.14	9.6	0.00128858	1.54393			NC + CCI 3	21.12
	20.57			30.12
	20.59			30.25
KD + CCI 1	20.84	20.9067	NC + CCI 1	31.31	31.3967	10.49	0.000695337	0.833128			KD + CCI 1	54.72
	20.88			31.38
	21			31.5
KD + CCI 2	19.97	20.2667	NC + CCI 2	30.82	30.9733	10.7067	0.000598373	0.716949			KD + CCI 2	27.36
	20.19			30.88
	20.64			31.22
KD + CCI 3	20.14	20.2	NC + CCI 3	30.13	30.46	10.26	0.000815516	0.977121			KD + CCI 3	42.56
	20.16			30.49
	20.31			30.75
					Mean Sham		0.00083461

## Sheet: Statistic analysis
Figure 7	B	Scramble + Sham Female	Scramble + CCI Female	shGper1 + CCI Female	6	7	6	two-way ANOVA with Turkey's multiple comparisons test	Baseline: ns, P=0.6359 (Sc+S vs Sc+C); ns, P=0.8201 (Sc+S vs sh+C); ns, P=0.9551 (Sc+C vs sh+C)	Treatment: ****, P<0.0001 (Sc+S vs Sc+C); ns, P=0.0632 (Sc+S vs sh+C); **, P=0.0023 (Sc+C vs sh+C)"		F (2, 32) = 12.61
		Scramble + Sham Male	Scramble + CCI Male	shGper1 + CCI Male	7	7	8	two-way ANOVA with Turkey's multiple comparisons test	Baseline: ns, P=0.7323 (Sc+S vs Sc+C); ns, P=0.7949 (Sc+S vs sh+C); ns, P=0.9904 (Sc+C vs sh+C)	Treatment: ****, P<0.0001 (Sc+S vs Sc+C); ns, P=0.0557 (Sc+S vs sh+C); **, P=0.0012 (Sc+C vs sh+C)"		F (2, 38) = 7.365
	C	Scramble + Sham Female	Scramble + CCI Female	shGper1 + CCI Female	6	7	6	two-way ANOVA with Turkey's multiple comparisons test	Baseline: ns, P=0.8270 (Sc+S vs Sc+C); ns, P=0.8233 (Sc+S vs sh+C); ns, P=0.9995 (Sc+C vs sh+C)	Treatment ****, P<0.0001 (Sc+S vs Sc+C); ns, P=0.3577 (Sc+S vs sh+C); ***, P=0.0006 (Sc+C vs sh+C)"		F (2, 32) = 7.565
		Scramble + Sham Male	Scramble + CCI Male	shGper1 + CCI Male	7	7	8	two-way ANOVA with Turkey's multiple comparisons test	Baseline: ns, P=0.5757 (Sc+S vs Sc+C); ns, P=0.7927 (Sc+S vs sh+C); ns, P=0.9194 (Sc+C vs sh+C)	Treatment ****, P<0.0001 (Sc+S vs Sc+C); ns, P=0.0709 (Sc+S vs sh+C); ****, P<0.0001 (Sc+C vs sh+C)"		F (2, 38) = 16.09
	D	Scramble + Sham Female	Scramble + CCI Female	shGper1 + CCI Female	6	7	6	one-way ANOVA with Turkey's multiple comparisons test	Treatment **, P=0.0010 (Sc+S vs Sc+C); ns, P=0.3222 (Sc+S vs sh+C); *, P=0.0248 (Sc+C vs sh+C)"			F (DFn, DFd)：0.5073 (2, 16)
		Scramble + Sham Male	Scramble + CCI Male	shGper1 + CCI Male	7	7	8	one-way ANOVA with Turkey's multiple comparisons test	Treatment ****, P<0.0001 (Sc+S vs Sc+C); *, P=0.0136 (Sc+S vs sh+C); *, P=0.0144 (Sc+C vs sh+C)"			F (DFn, DFd)：0.3935 (2, 19)
	F	Scramble + Sham	Scramble + CCI	shGper1 + CCI	3	3	3	one-way ANOVA with Turkey's multiple comparisons test	*, P=0.0338 (Sc+S vs Sc+C); ns, P=0.3203 (Sc+S vs sh+C); **, P=0.0060 (Sc+C vs sh+C)			F (DFn, DFd)：0.1602 (2, 6)
